# Supplementary material for: Preferential regulation of stably expressed genes in the human genome suggests a widespread expression buffering role of microRNAs
Source: PubMed Central journal article supplement (PMC3521228; doi:10.1186/1471-2164-13-s7-s14), 2012-12-07

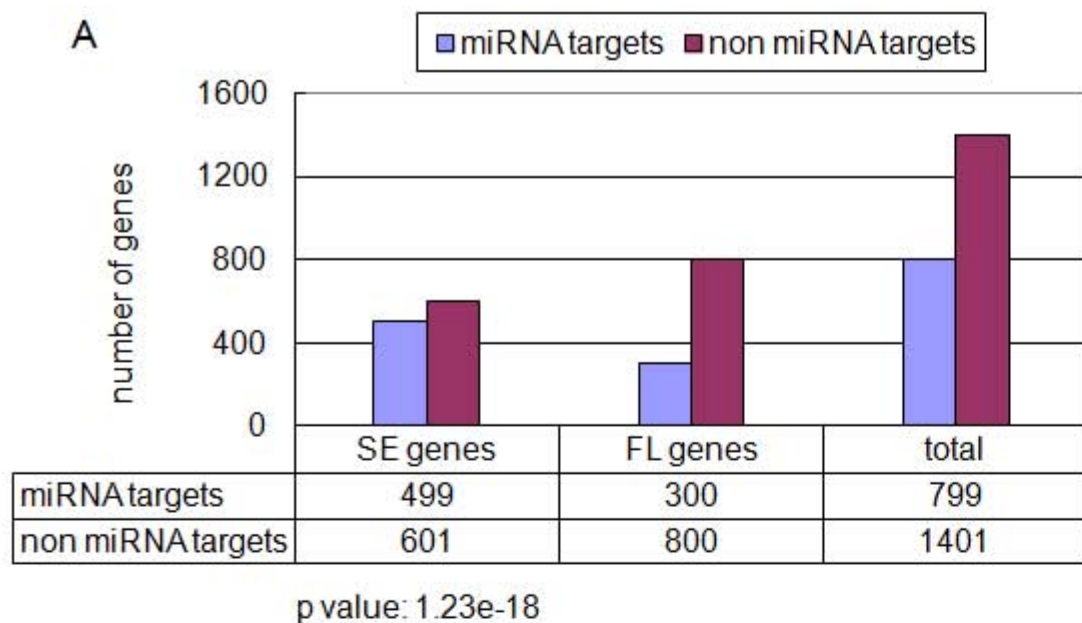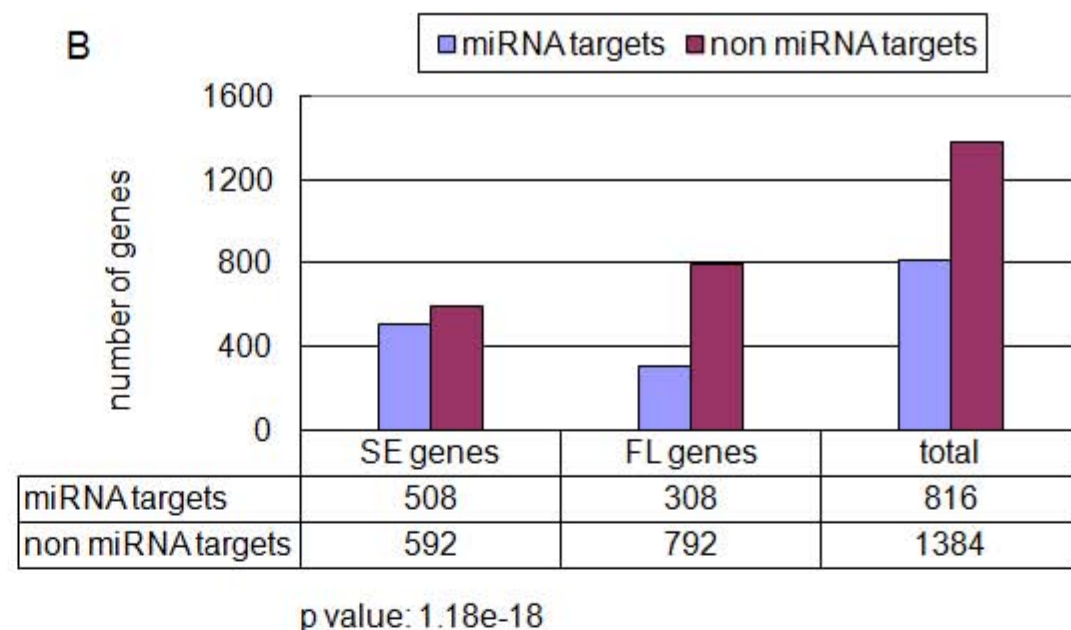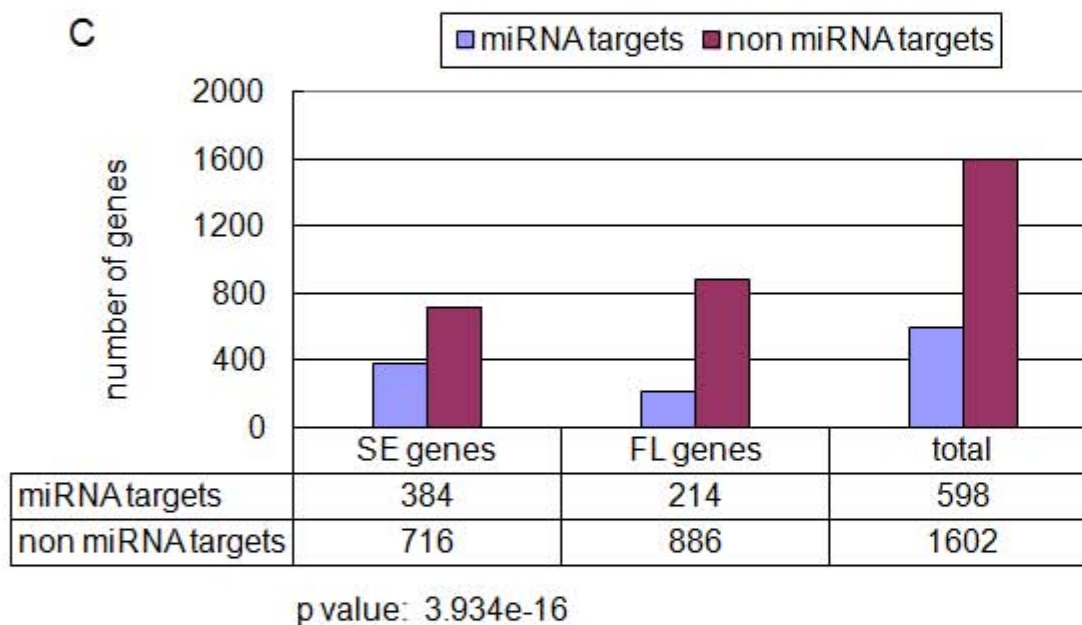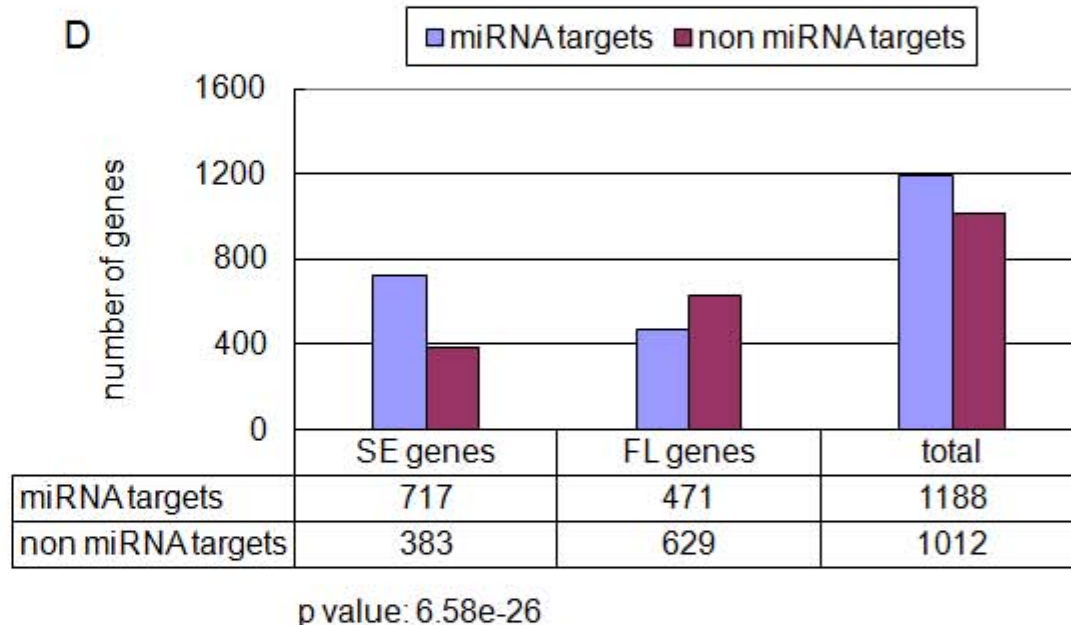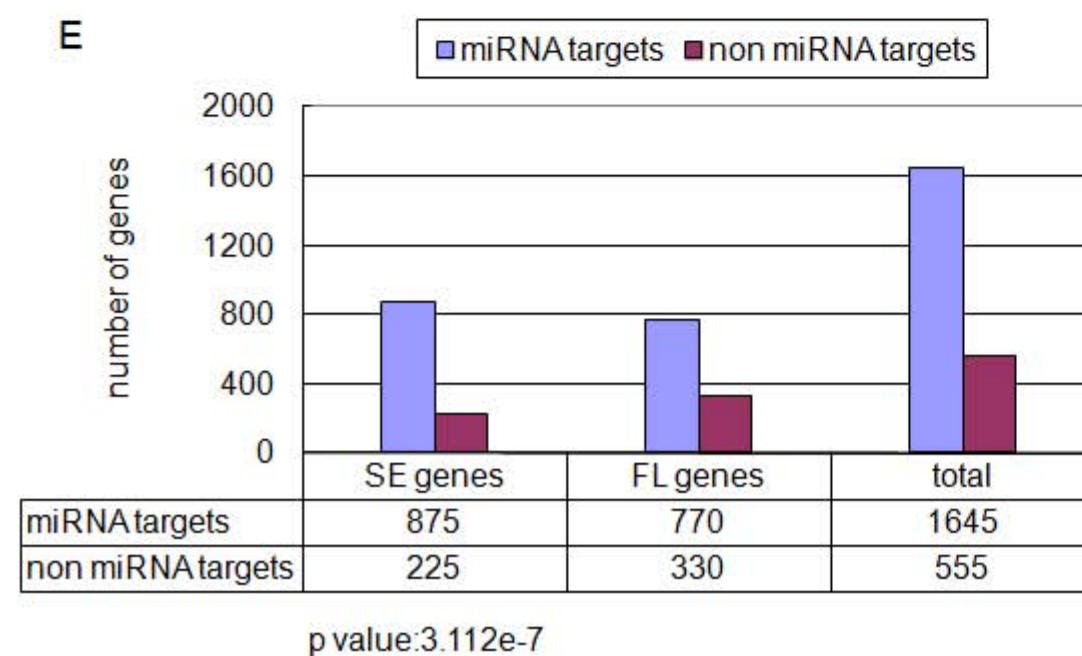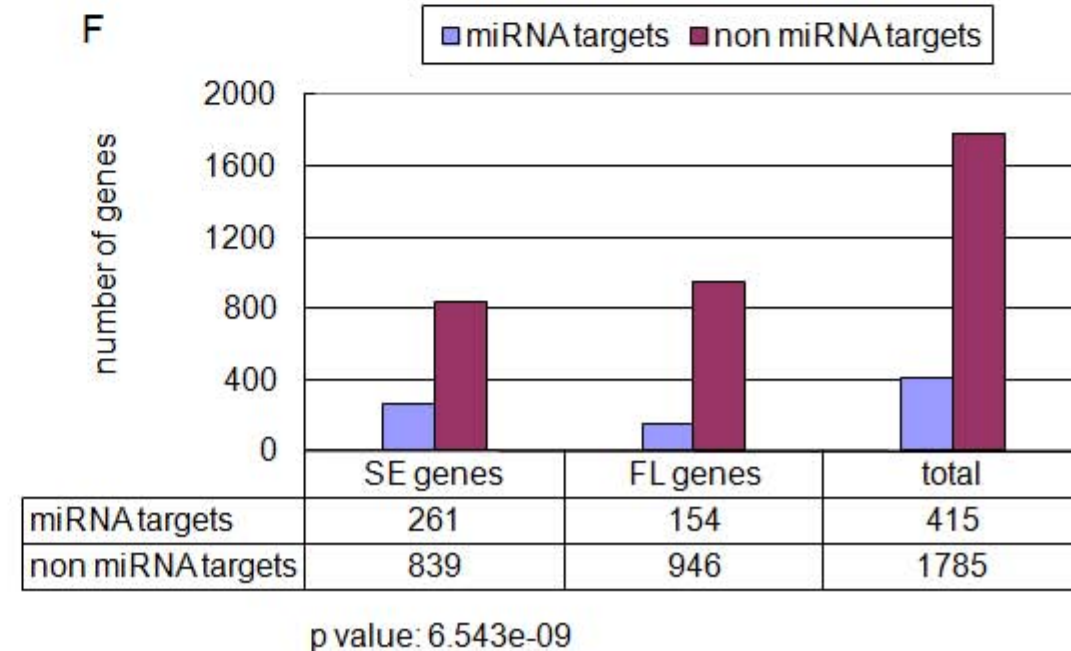

Supplement: 1471-2164-13-S7-S14-S4.pdf [file 1471-2164-13-S7-S14-S4.pdf]
